# Supplementary material for: In-House Validation of an SPE-GC-FID Method for the Detection of Free and Esterified Hydroxylated Minor Compounds in Virgin Olive Oils
Source: MDPI journal article supplement (doi:10.3390/foods10061260), 2021-06-02
Supplement: s1 [file s1]

**Table S1.** Relative retention time of compounds detected in samples employed for in-house validation

| Peak identification                    |                         |
|----------------------------------------|-------------------------|
| <i>Free minor compounds</i>            | Relative retention time |
| Campesterol                            | 1.05                    |
| Stigmasterol                           | 1.06                    |
| Clerosterol                            | 1.08                    |
| B-Sitosterol                           | 1.10                    |
| $\Delta^5$ Avenasterol                 | 1.10                    |
| Cicloartenol + $\Delta^7$ Stigmastenol | 1.11                    |
| 24-Methylenecycloartenol               | 1.13                    |
| Citrostadienol + Erythrodiol           | 1.15                    |
| <i>Esterified minor compounds</i>      | Relative retention time |
| $\Delta^7$ Campesteryl C18:1           | 1.10                    |
| Sitosteryl C18:1                       | 1.11                    |
| Cicloartenyl C18:1                     | 1.12                    |
| $\Delta^7$ Stigmasteryl C18            | 1.14                    |
| $\Delta^7$ Avenasteryl C18             | 1.14                    |
| 24 Methylene Cycloartenyl C18:1        | 1.15                    |
| Citrostadienyl C18:1                   | 1.16                    |
